# Supplementary material for: PASCAL versus MitraClip-XTR edge-to-edge device for the treatment of tricuspid regurgitation: a propensity-matched analysis
Source: Springer Nature journal article supplement (doi:10.1007/s00392-020-01784-w), 2020-12-12
Supplement: MOESM3 [file 18678362]

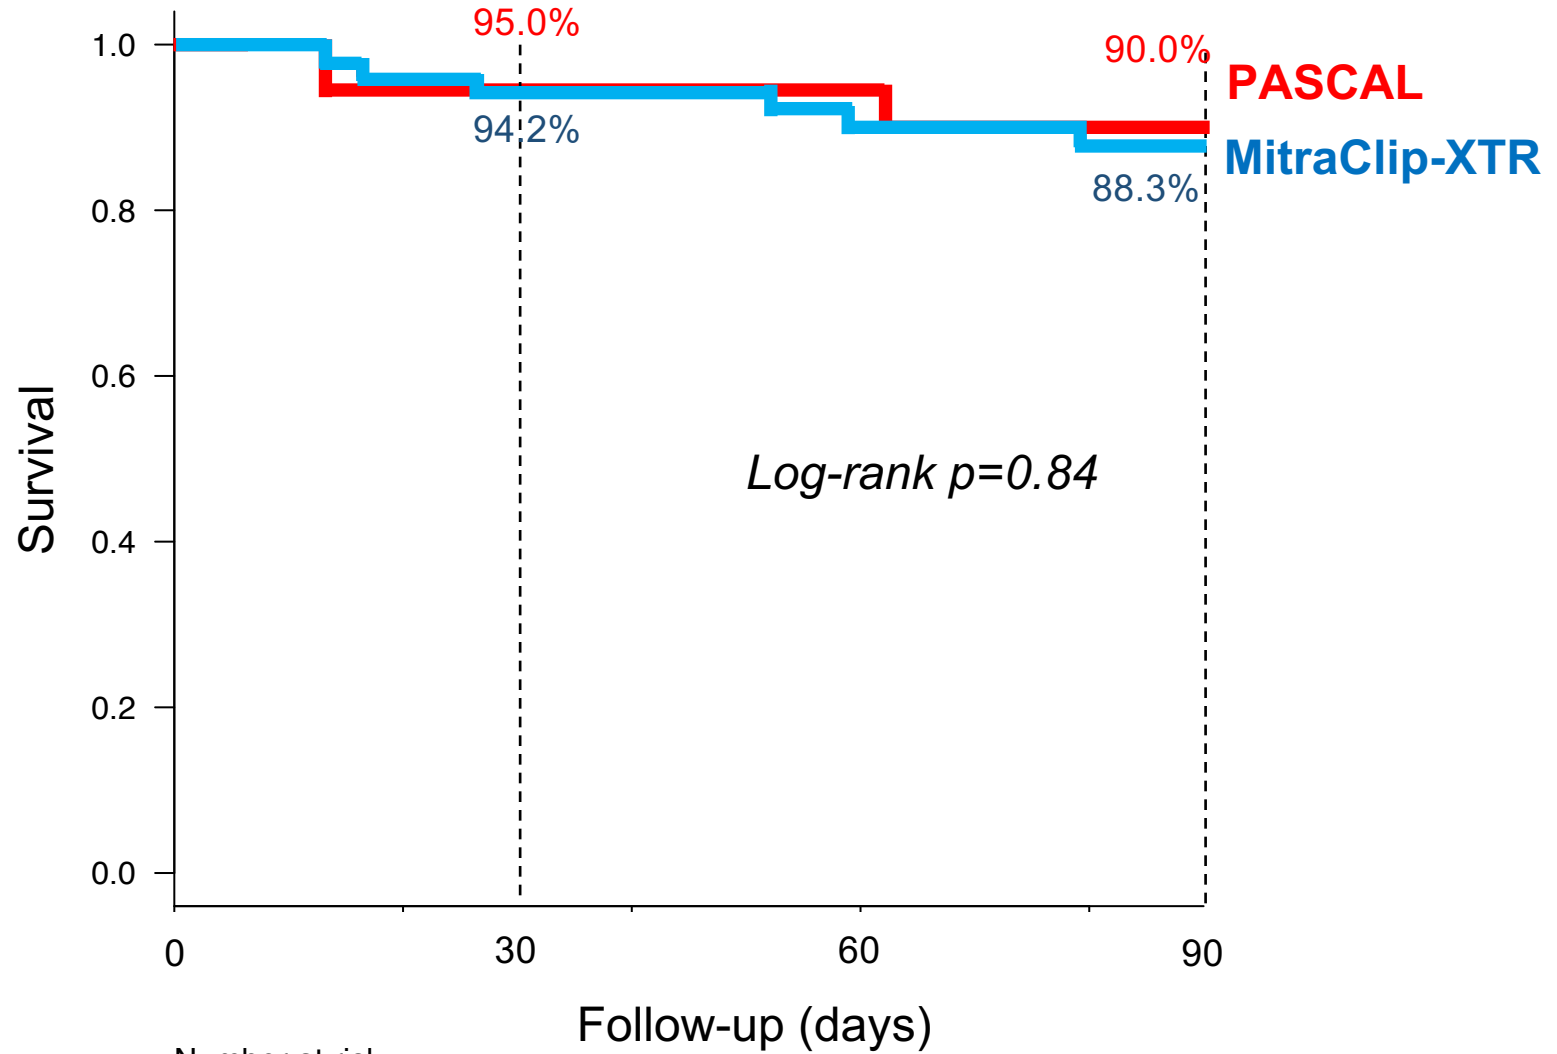

Number at risk

|               |    |    |    |    |
|---------------|----|----|----|----|
| PASCAL        | 22 | 20 | 20 | 19 |
| MitraClip-XTR | 58 | 51 | 48 | 43 |
