# Supplementary material for: PASCAL versus MitraClip-XTR edge-to-edge device for the treatment of tricuspid regurgitation: a propensity-matched analysis
Source: Springer Nature journal article supplement (doi:10.1007/s00392-020-01784-w), 2020-12-12
Supplement: MOESM4 [file 18678362]

84 Pascal or MitraClip XTR  
from 2018 April to 2020 June

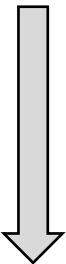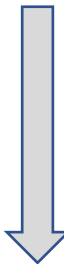

22 PASCAL

58 MitraClip-XTR

***Propensity score matching***

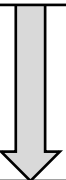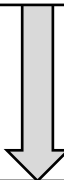

22 PASCAL

22 MitraClip-XTR

1 PASCAL and Cardioband

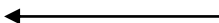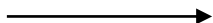

3 MitraClip-XTR and Cardioband
